# Supplementary material for: Receptor-Based Virtual Screening of EGFR Kinase Inhibitors from the NCI Diversity Database
Source: PubMed Central journal article supplement (PMC6264413; doi:10.3390/molecules15064041), 2010-06-04
Supplement: molecules-15-04041-s001.pdf [file molecules-15-04041-s001.pdf]

## Supplementary data

S1. The explanation for the Mean Graph of GI<sub>50</sub>: the mean GI<sub>50</sub> graph demonstrated the selective nature of growth inhibition of human derived cancer cell lines. The positive and negative values means resistance and sensitivity of a particular cell line, respectively.

### Erlotinib

#### GI<sub>50</sub> Mean Graph for Compound 718781

NCI Cancer Screen Current Data, May 2009

Average GI<sub>50</sub> over all cell lines is 5.51E-6

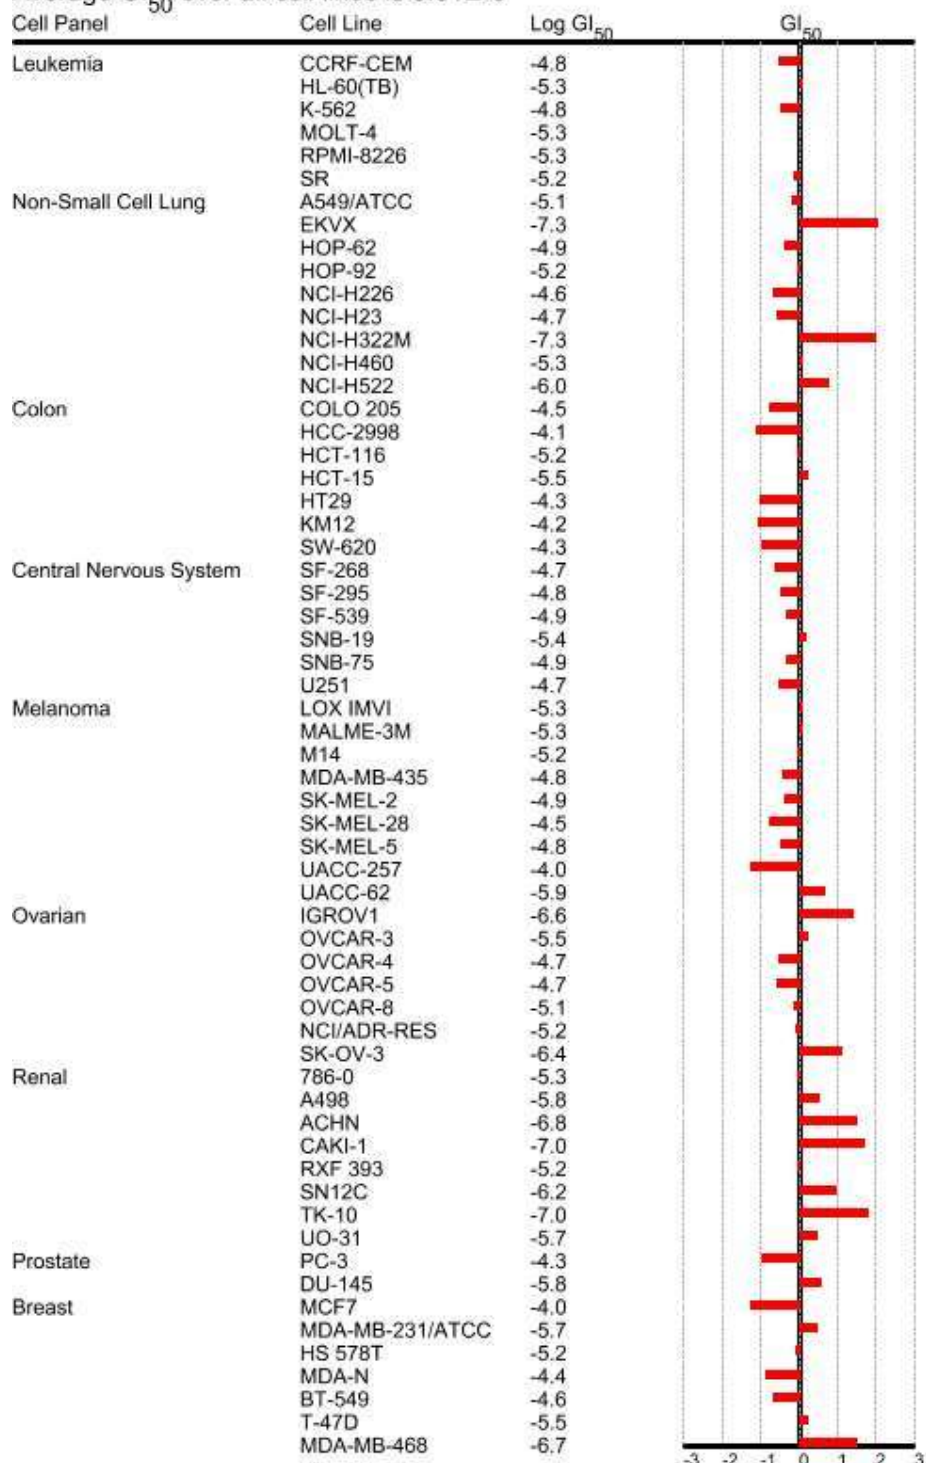

### Gefitinib

#### GI<sub>50</sub> Mean Graph for Compound 715055

NCI Cancer Screen Current Data, October 2009

Average GI<sub>50</sub> over all cell lines is 3.24E-6

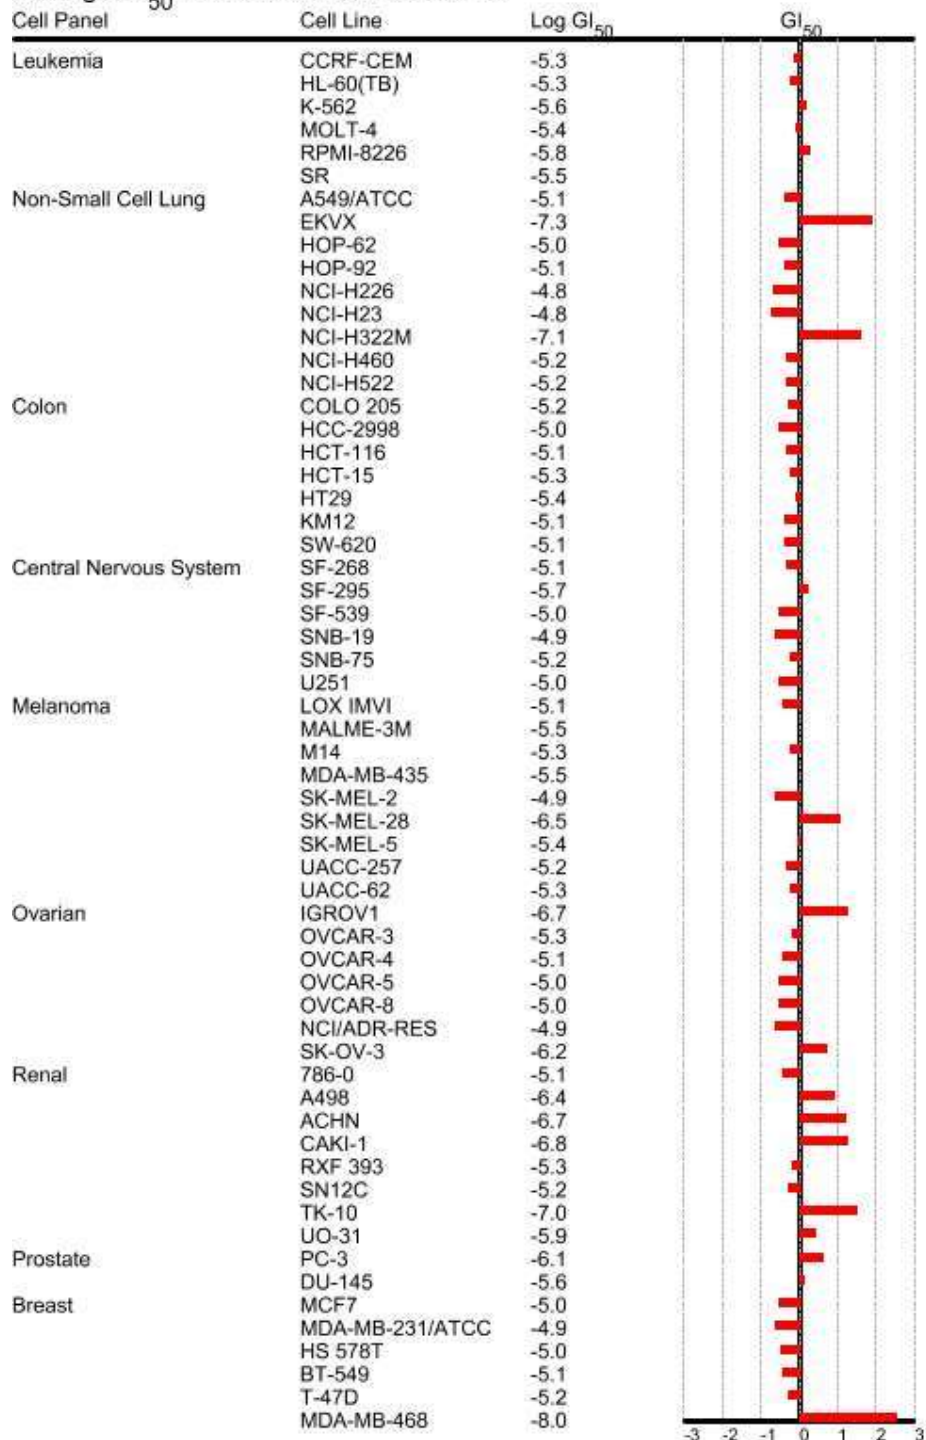

**Compound B**

**GI<sub>50</sub> Mean Graph for Compound 48283**

NCI Cancer Screen Current Data, May 2009

Average GI<sub>50</sub> over all cell lines is 9.76E-5

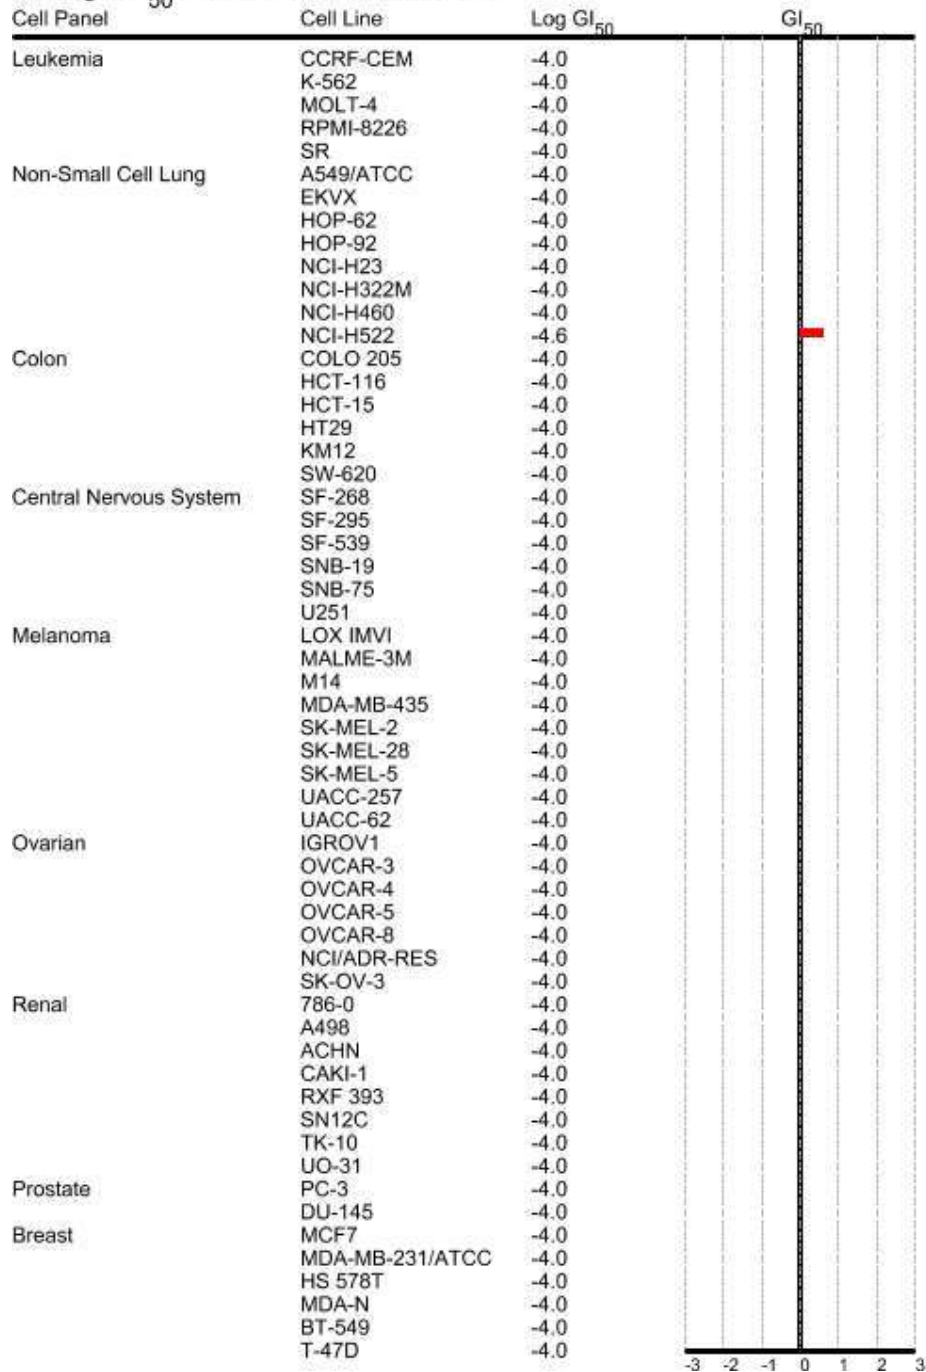

## Compound G

### GI<sub>50</sub> Mean Graph for Compound 125910

NCI Cancer Screen Current Data, May 2009

Average GI<sub>50</sub> over all cell lines is 9.86E-5

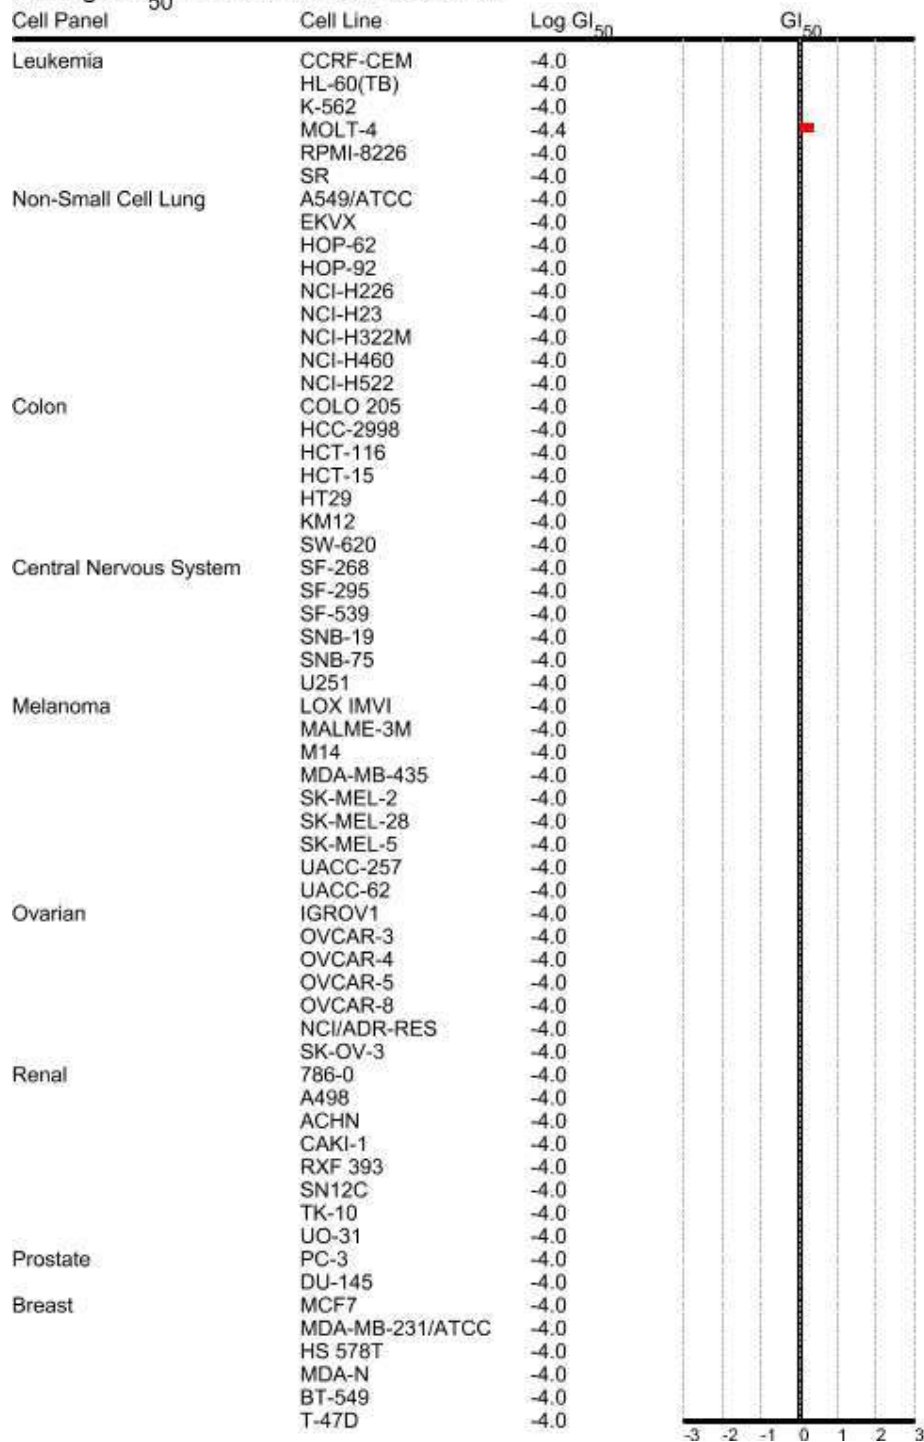

## Compound H

### GI<sub>50</sub> Mean Graph for Compound 130813

NCI Cancer Screen Current Data, May 2009

Average GI<sub>50</sub> over all cell lines is 1.94E-6

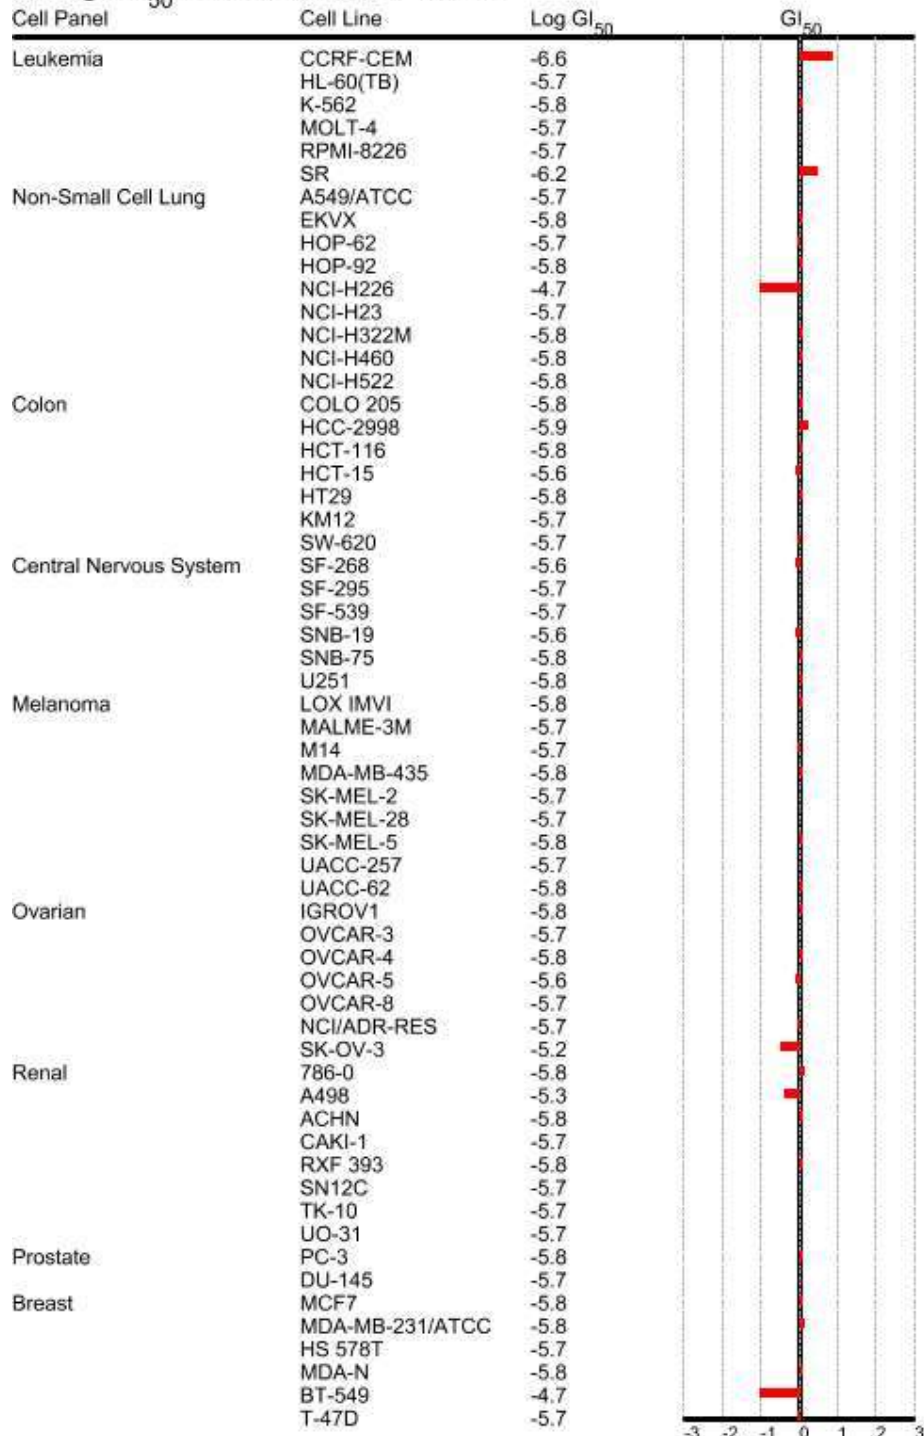



## Compound I

### GI<sub>50</sub> Mean Graph for Compound 135371

NCI Cancer Screen Current Data, May 2009

Average GI<sub>50</sub> over all cell lines is 3.95E-5

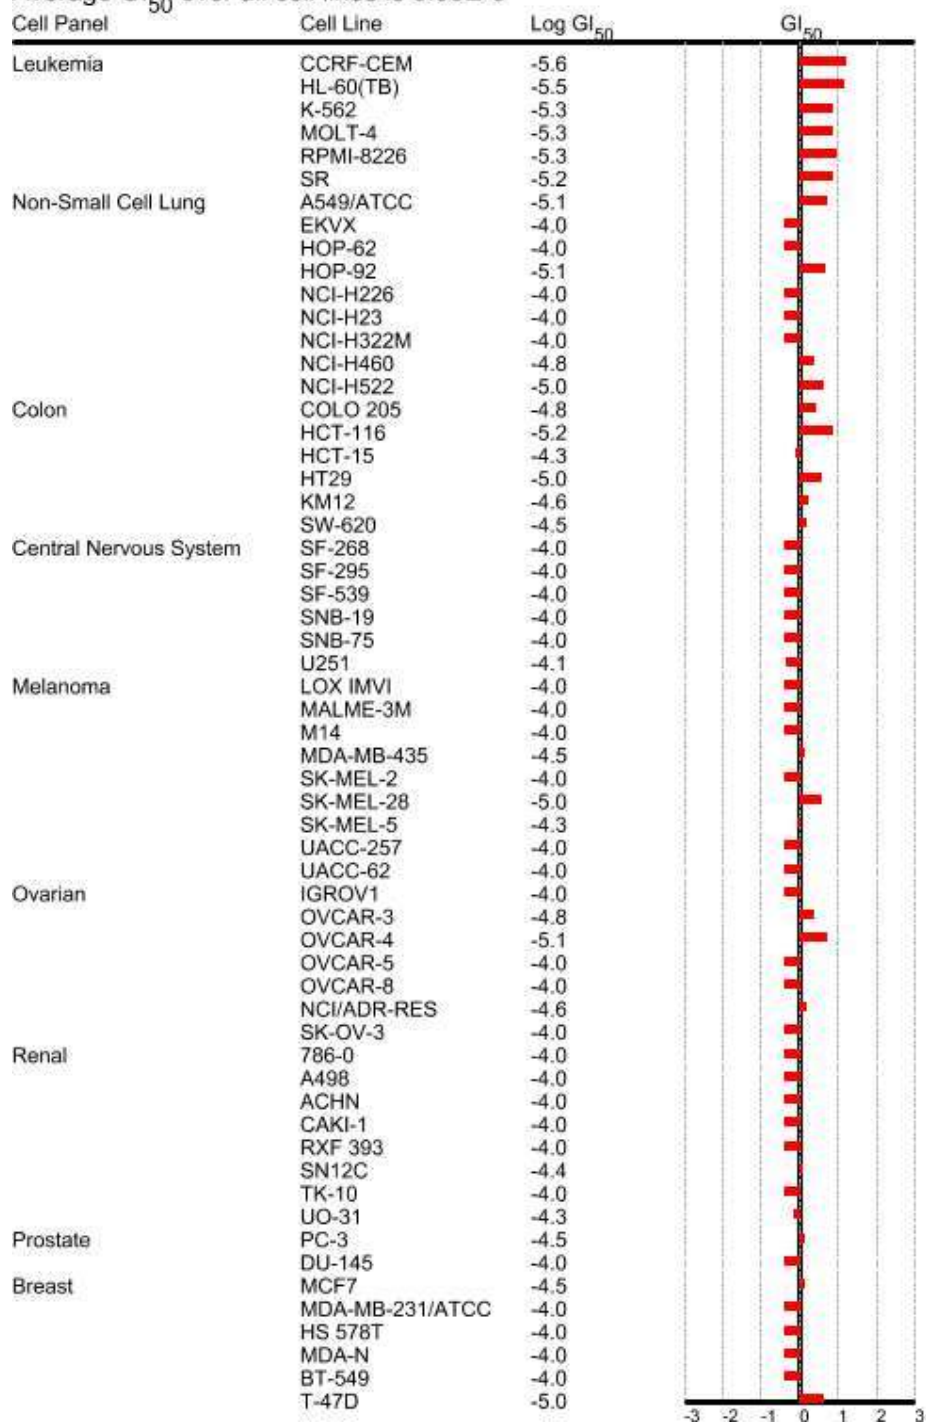

**Compound J**

**GI<sub>50</sub> Mean Graph for Compound 299137**

NCI Cancer Screen Current Data, May 2009

Average GI<sub>50</sub> over all cell lines is 7.03E-5

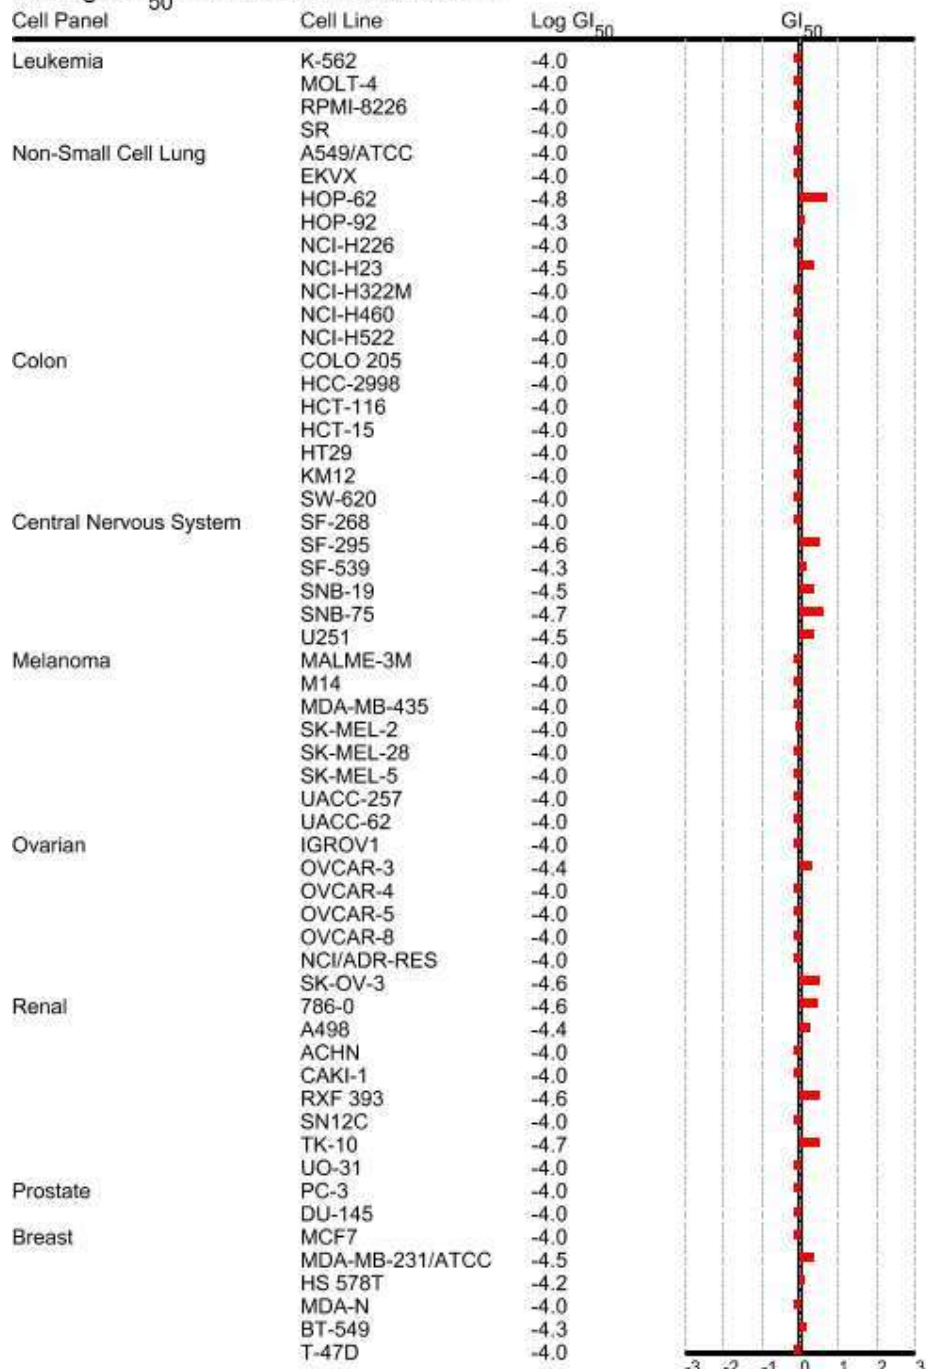

## Compound K

GI<sub>50</sub> Mean Graph for Compound 306698

NCI Cancer Screen Current Data, May 2009

Average GI<sub>50</sub> over all cell lines is 3.25E-6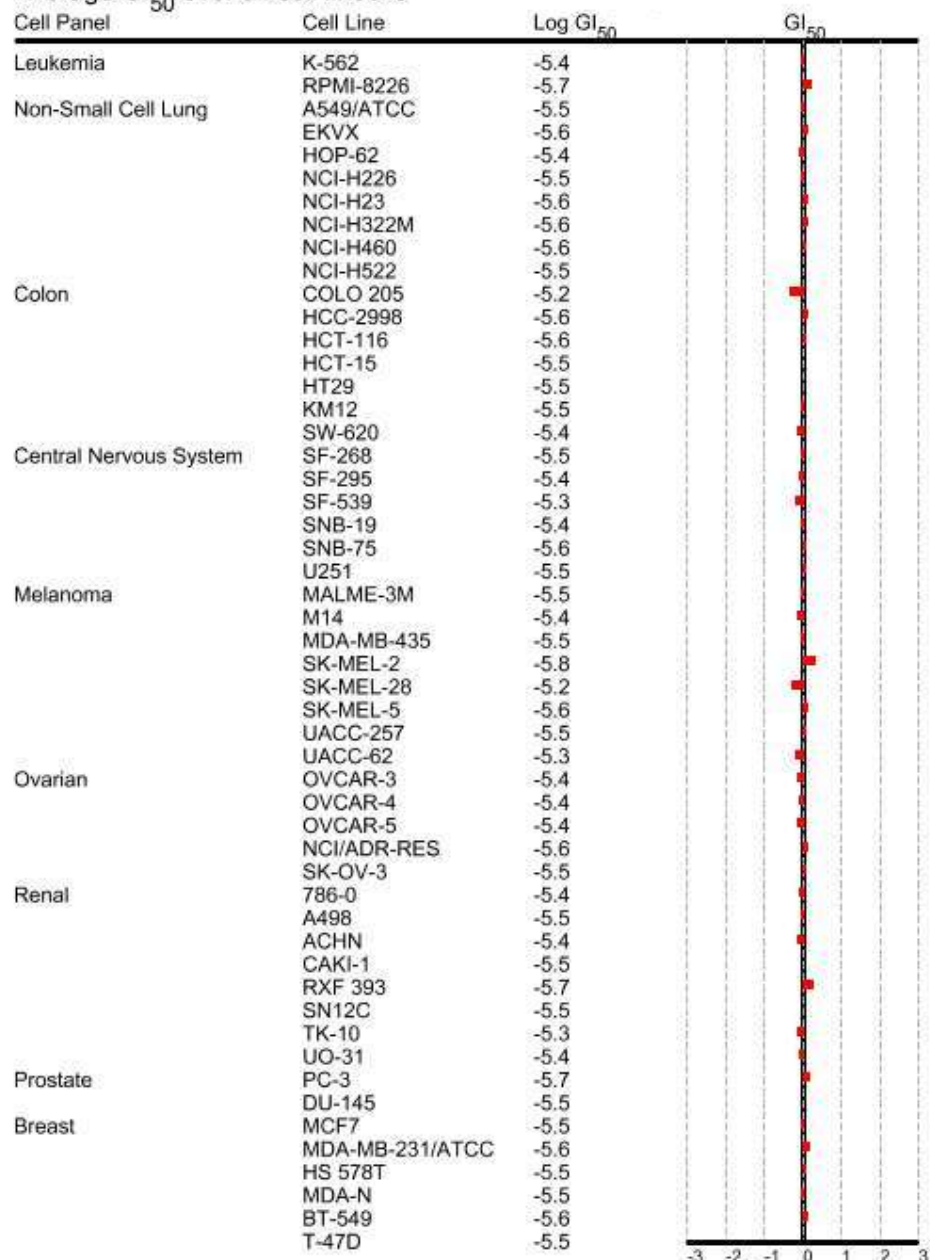



**Compound L**

**GI<sub>50</sub> Mean Graph for Compound 351123**

NCI Cancer Screen Current Data, May 2009

Average GI<sub>50</sub> over all cell lines is 9.02E-5

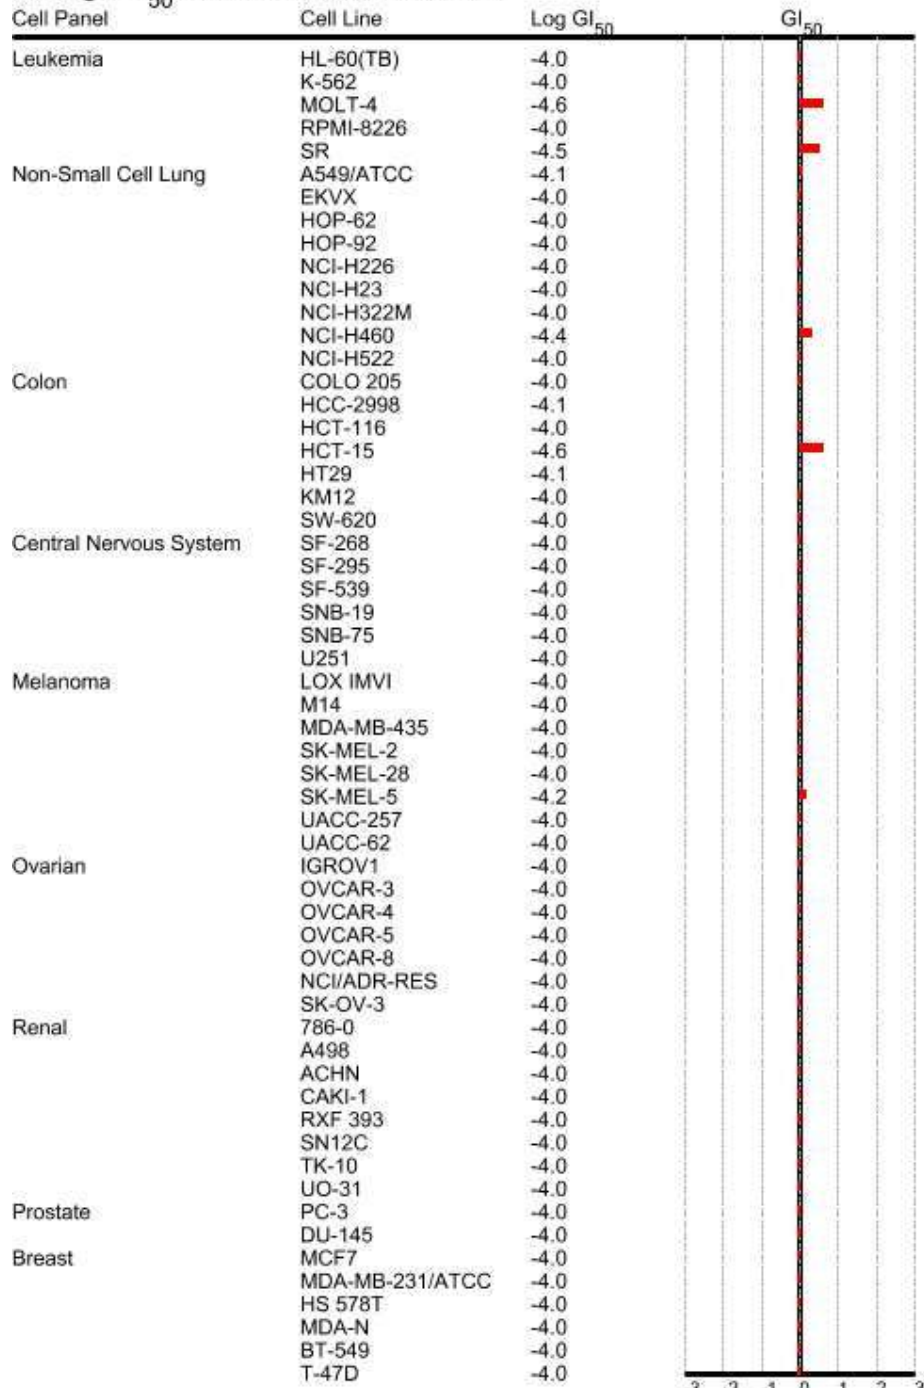

**Compound M****GI<sub>50</sub> Mean Graph for Compound 402959**

NCI Cancer Screen Current Data, May 2009

Average GI<sub>50</sub> over all cell lines is 5.5E-5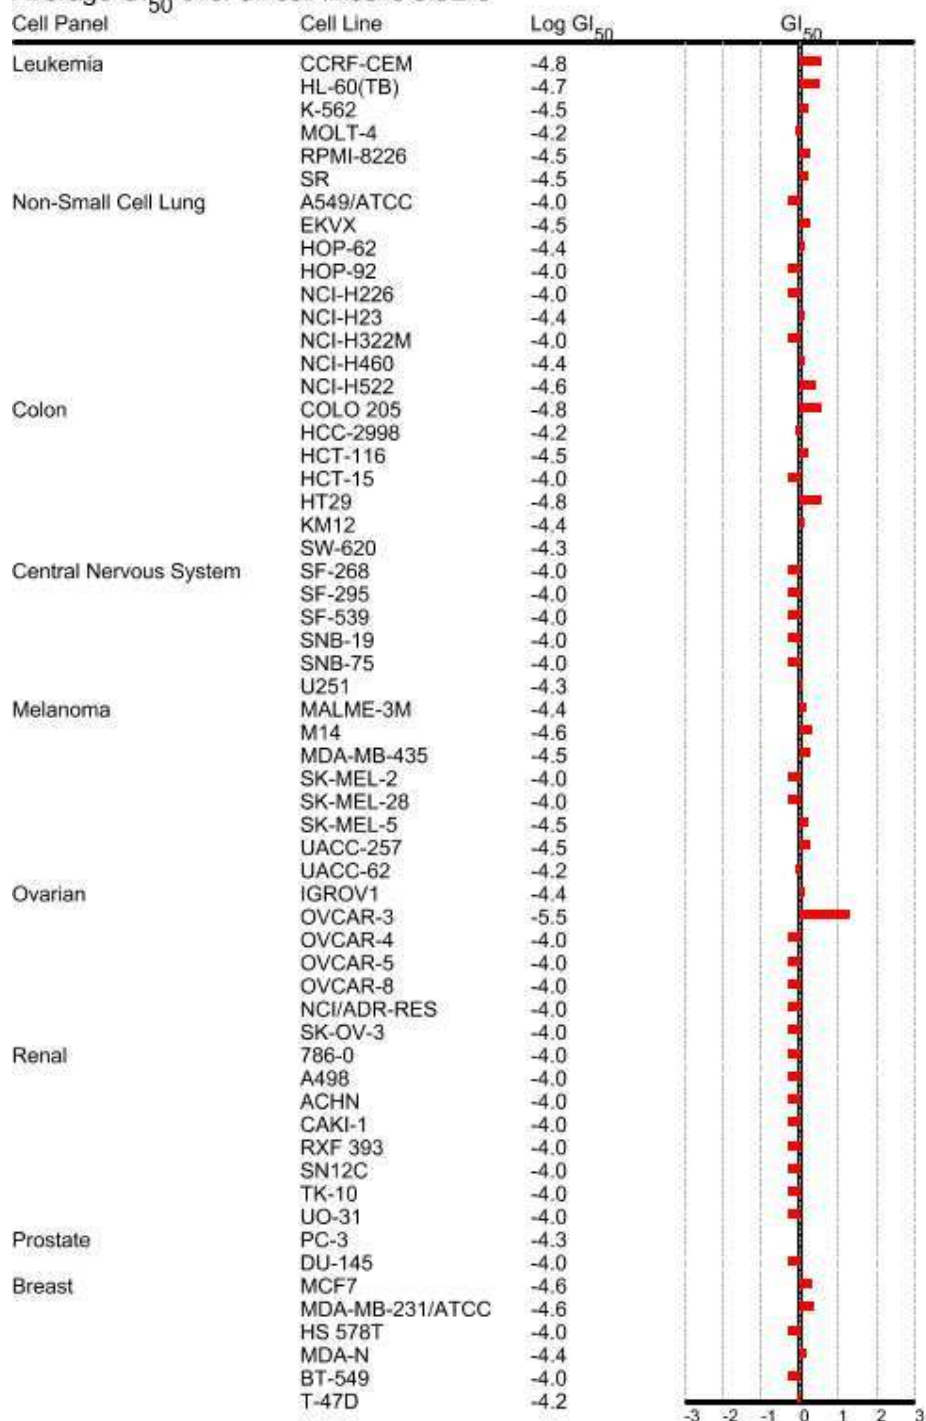

*Sample Availability:* Samples are available from the authors.

**S2.** Diagram showing the interaction between the EGFR-TK and the eight candidate compounds using Ligand Interactions module in MOE package.

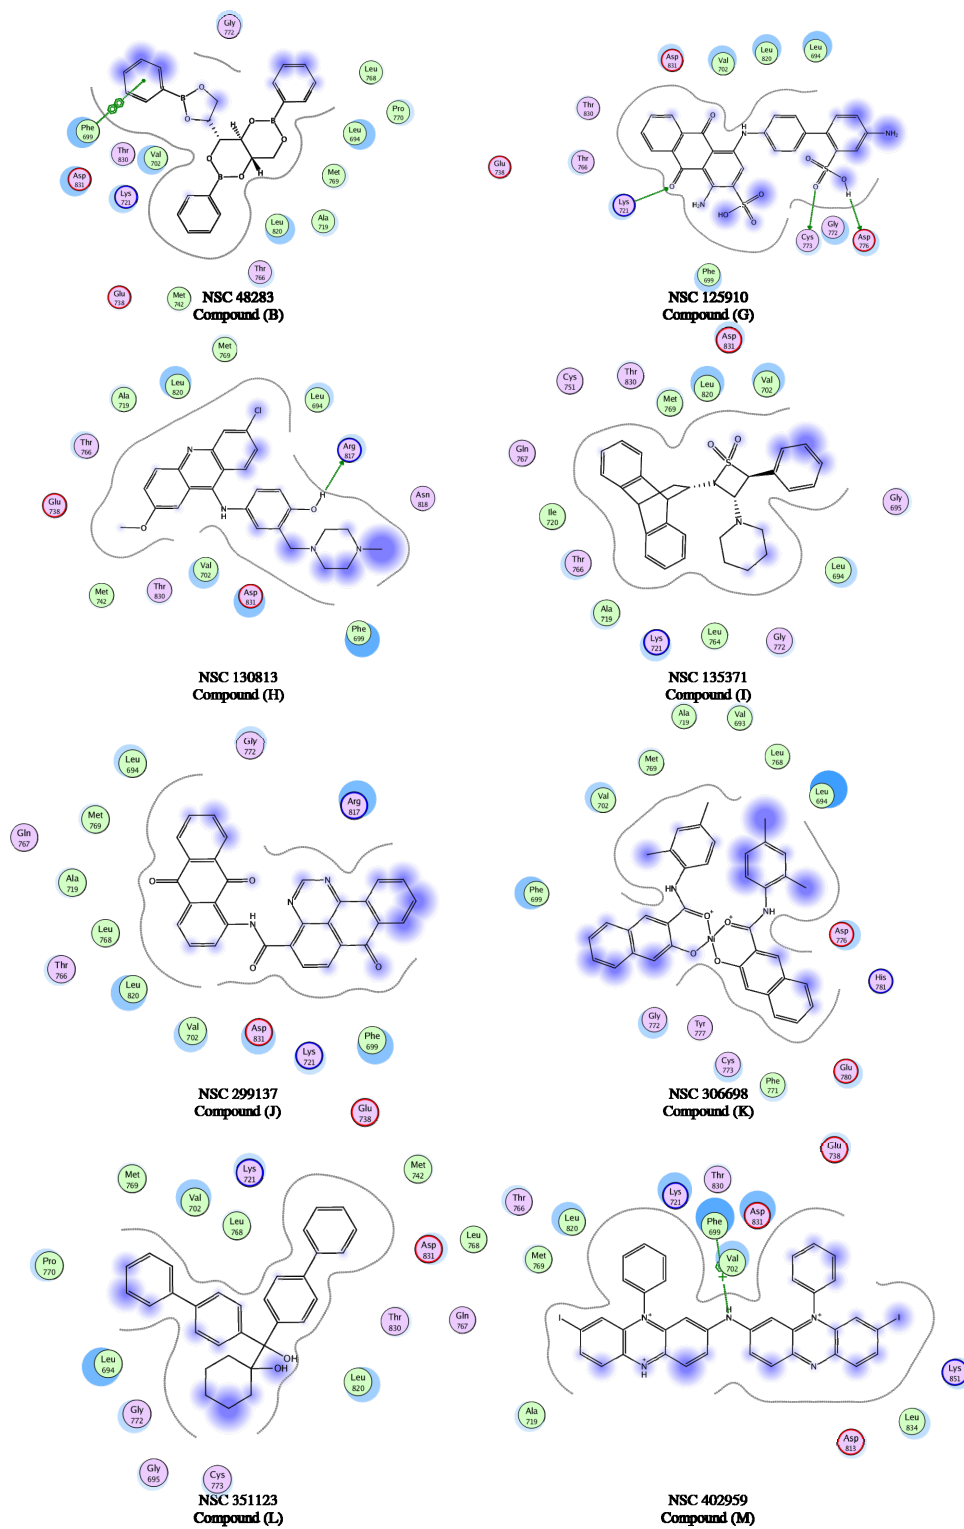

**Table S1.** The binding free energy and the score fitness value of the 3 known inhibitors from GOLD docking and scoring calculations.

| Compounds | NSC no. | RMSD (Å)       | RMSD (Å)       | KCS score<br>fitness<br>value | GOLD               |                   |                       | $\Delta G(\text{kJ/mol})$ | Average<br>$GI_{50}^{\dagger}$<br>( $\mu\text{g/ml}$ ) |
|-----------|---------|----------------|----------------|-------------------------------|--------------------|-------------------|-----------------------|---------------------------|--------------------------------------------------------|
|           |         | All heavy atom | Core structure |                               | Hbond <sup>§</sup> | Lipo <sup>‡</sup> | DE Clash <sup>*</sup> |                           |                                                        |
| Gefitinib | 715055  | 3.67           | 0.81           | 30.05                         | 0.70               | 229.62            | 0.26                  | -31.00                    | $3.24 \times 10^{-6}$                                  |
| Erlotinib | 718781  | 1.74           | 0.34           | 28.65                         | 0.61               | 237.36            | 1.49                  | -31.03                    | $5.51 \times 10^{-6}$                                  |
| AEE788    | N/A     | 1.37           | 0.68           | 32.55                         | 1.65               | 220.57            | 0.80                  | -34.04                    | N/A                                                    |

<sup>†</sup>The average  $GI_{50}$  overall cell line from NCI Cancer Screen Current Data, May 2009. The  $GI_{50}$  means drug concentration causing 50% cell-growth inhibition; <sup>§</sup> and <sup>‡</sup> refer to protein-ligand H-bond and lipophilic contribution to the chemscore values, respectively, and <sup>\*</sup> refer to protein-ligand clash penalty to the chemscore value.

**S3.** The core structure of the known inhibitors that used for calculate the RMSD values, the aniline-quinazoline group from gefitinib and erlotinib and the phenethyl-amino-pyrrolopyrimidine group from AEE 788.

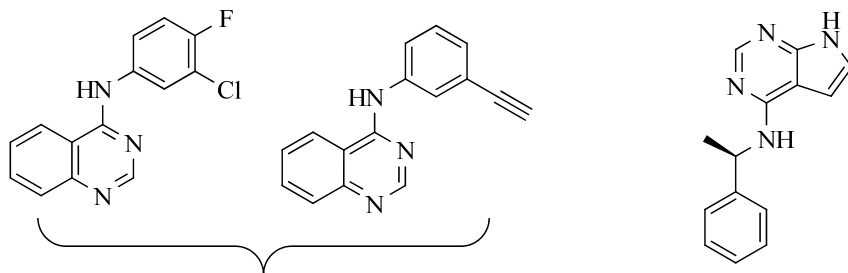

anilino-quinazoline group from gefitinib (left) and erlotinib (right) core structure of AEE 788
